# Supplementary material
Source: publisher figshare collection journal article supplement (https://acs.figshare.com/ndownloader/files/24697703)
Supplement: Supplementary file 1 [file 24697703]

## Supporting Information

# Metal-Organic Frameworks Coated Photonic Crystals for High-Performance Thin Layer Chromatography

*Qianqian Fu, Yumei Ran, Xin Zhang, and Jianping Ge\**

School of Chemistry and Molecular Engineering, Shanghai Key Laboratory of Green Chemistry and Chemical Processes, East China Normal University, Shanghai, China, 200062.

E-mail: [jpgge@chem.ecnu.edu.cn](mailto:jpgge@chem.ecnu.edu.cn)

## Contents

|                                                                                                                                                      |    |
|------------------------------------------------------------------------------------------------------------------------------------------------------|----|
| 1. FTIR spectra of calcinated SiO <sub>2</sub> , SiO <sub>2</sub> -OH, SiO <sub>2</sub> -NH <sub>2</sub> , and SiO <sub>2</sub> -COOH particles..... | 2  |
| 2. Digital photos of SiO <sub>2</sub> PC, HKUST-1/PC, MIL-100/PC, and ZIF-8/PC films.....                                                            | 3  |
| 3. Transmission spectra of SiO <sub>2</sub> PC, HKUST-1/PC, MIL-100/PC, and ZIF-8/PC films.....                                                      | 4  |
| 4. Separation of cresol isomers by commercial gas chromatography. ....                                                                               | 5  |
| 5. SRRS of clean MOF/PC film and o-cresol loaded MOF/PC film.....                                                                                    | 6  |
| 6. Separation of o-cresol and m-cresol on MIL-100/PC plates in 3 repeated tests. ....                                                                | 6  |
| 7. Stability and durability of MOF/PC plates.....                                                                                                    | 7  |
| 8. Development of cresols on MIL-100/PC plate with different cycles of MOF depositions.....                                                          | 8  |
| 9. Separation of chlorophenols, benzenediol isomers on MIL-100/PC TLC plate. ....                                                                    | 9  |
| 10. Comparison of chromatographic parameters of MOF/PC TLC, TLC and GC .....                                                                         | 10 |
| 11. Calculation of plate number (N), selectivity factor ( $\alpha$ ), and resolution (R) .....                                                       | 10 |

**1. FTIR spectra of calcinated  $\text{SiO}_2$ ,  $\text{SiO}_2\text{-OH}$ ,  $\text{SiO}_2\text{-NH}_2$ , and  $\text{SiO}_2\text{-COOH}$  particles.**

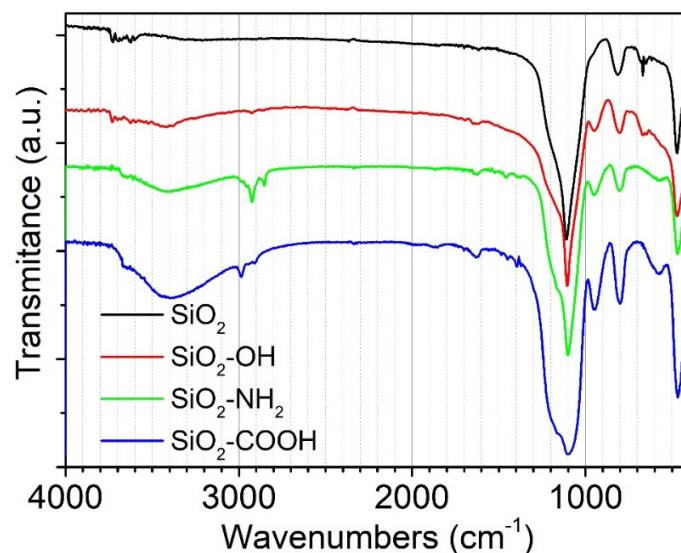

**Figure S1.** FTIR spectra of calcinated  $\text{SiO}_2$ , silanol recovered  $\text{SiO}_2$ ,  $\text{SiO}_2\text{-NH}_2$  and  $\text{SiO}_2\text{-COOH}$  particles. 1) For silanol recovered  $\text{SiO}_2$  (red line), Si-OH stretching and bending vibration at 3400  $\text{cm}^{-1}$  and 950  $\text{cm}^{-1}$  demonstrated the recovery of silanol group. 2) For  $\text{SiO}_2\text{-NH}_2$  particles (green line), N-H stretching vibration at 3400  $\text{cm}^{-1}$ , C-H stretching at 2924  $\text{cm}^{-1}$  and 2854  $\text{cm}^{-1}$ , and C-N stretching at 1167  $\text{cm}^{-1}$  proved the modification of  $\text{NH}_2$  group. 3) For  $\text{SiO}_2\text{-COOH}$  particles (blue line), the C=O stretching vibration of amide at 1628  $\text{cm}^{-1}$  and O-H bending of carboxylic acid at 1402  $\text{cm}^{-1}$  proved the modification of COOH group.

**2. Digital photos of SiO<sub>2</sub> PC, HKUST-1/PC, MIL-100/PC, and ZIF-8/PC films.**

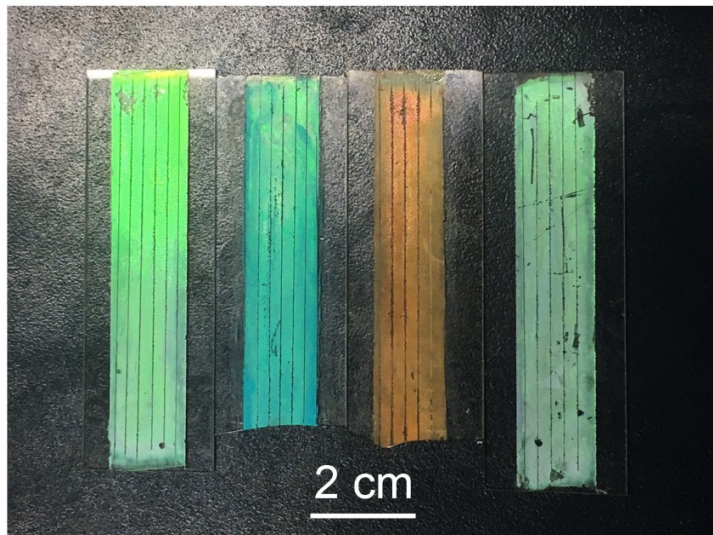

**Figure S2.** Digital photos (from left to right) of SiO<sub>2</sub> PC, HKUST-1/PC, MIL-100/PC, and ZIF-8/PC films. The natural colors of HKUST-1, MIL-100, and ZIF-8 are blue, yellowish-brown, and white.

**3. Transmission spectra of SiO<sub>2</sub> PC, HKUST-1/PC, MIL-100/PC, and ZIF-8/PC films.**

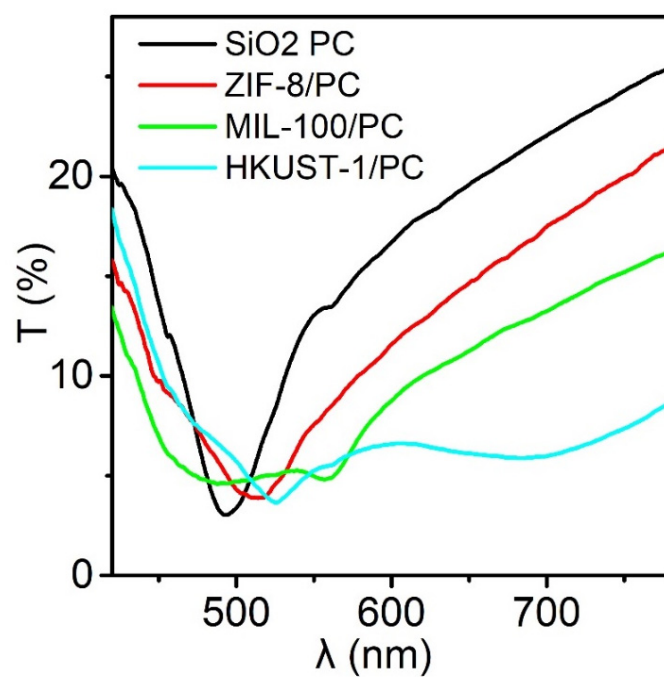

**Figure S3.** Transmission spectra of SiO<sub>2</sub> PC, HKUST-1/PC, MIL-100/PC, and ZIF-8/PC films.

4. Separation of cresol isomers by commercial gas chromatography.

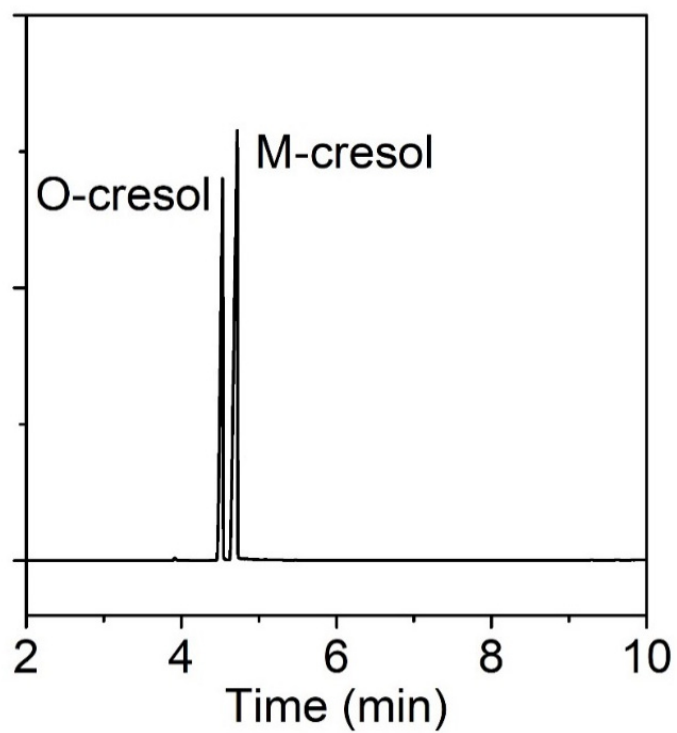

**Figure S4.** Separation of cresol isomers by commercial gas chromatography (GC) using methanol as the mobile phase and HP-5MS silica gel column as the stationary phase.

## 5. SRRS of clean MOF/PC film and o-cresol loaded MOF/PC film

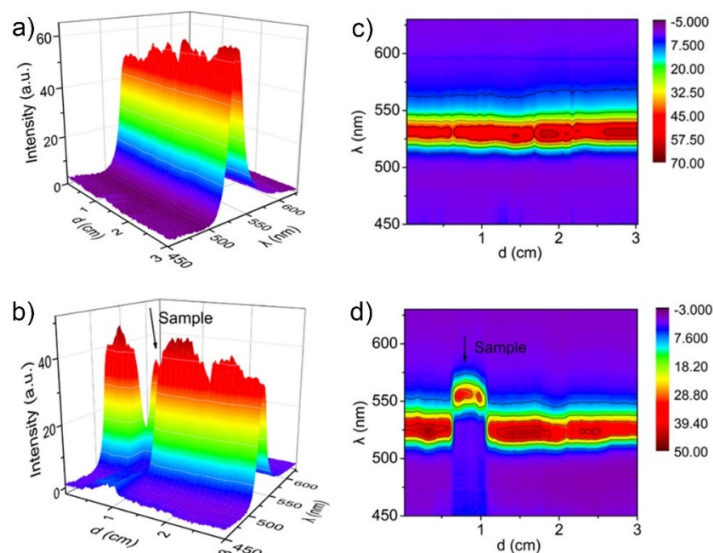

**Figure S5.** Spatially resolved reflection spectra (SRRS) are collected along the direction of development on a clean MOF/PC film and an o-cresol loaded MOF/PC film, which are further converted to (a, b) 3D surface maps and (c, d) contour maps.

## 6. Separation of o-cresol and m-cresol on MIL-100/PC plates in 3 repeated tests.

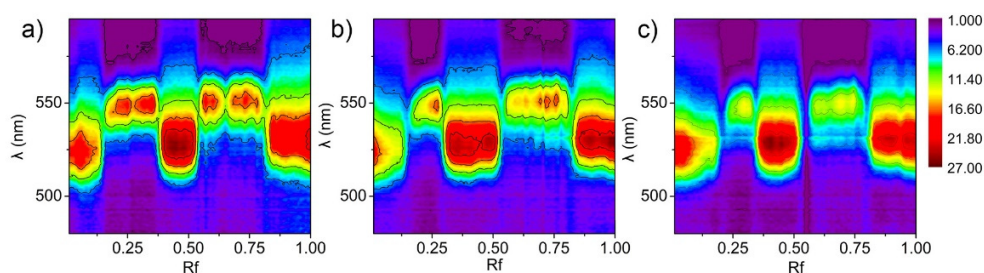

**Figure S6.** Spatial resolved 3D reflection spectra for the separation of o-cresol and m-cresol on a-c) three MIL-100/PC plates.

## 7. Stability and durability of MOF/PC plates.

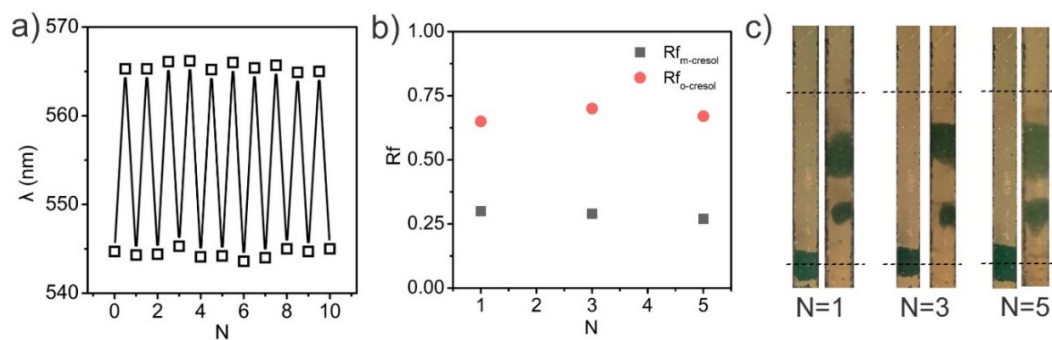

**Figure S7.** a) Periodic change of reflection wavelength of MIL-100/PC as m-cresol was repeatedly loaded and eluted. b) The retention factors of cresol isomers in c) the 1<sup>st</sup>, 3<sup>rd</sup>, and 5<sup>th</sup> separation on the same MIL-100/PC plate.

8. Development of cresols on MIL-100/PC plate with different cycles of MOF depositions.

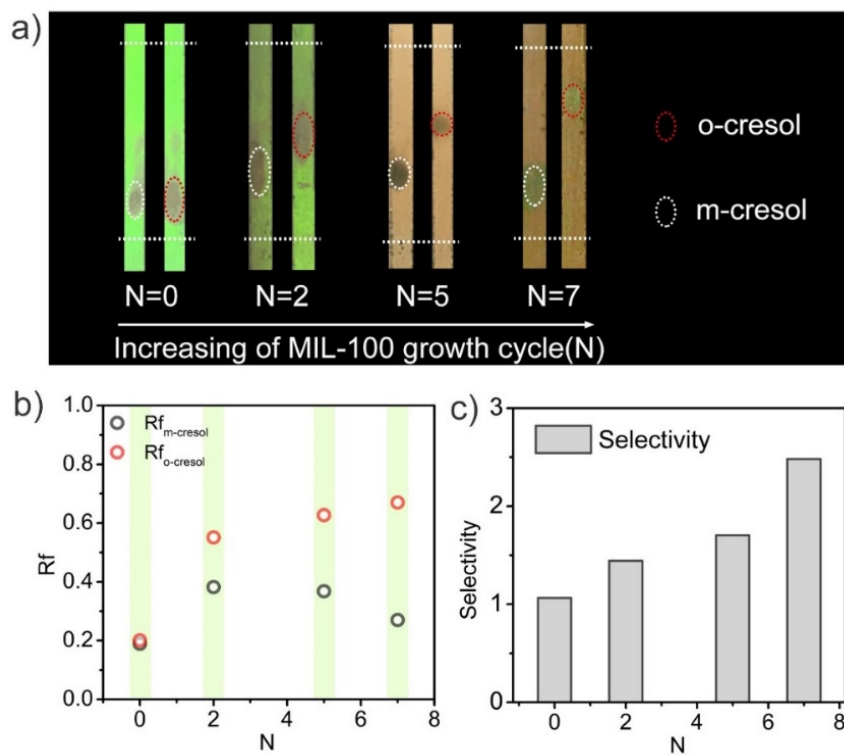

**Figure S8.** a) Development of o-cresol and m-cresol on MIL-100/PC plate prepared by 0, 2, 5, and 7 cycles of depositions in LBL growth. Comparison of b)  $R_f$  and c) selectivity of cresol isomers in the above developments.



9. Separation of chlorophenols, benzenediol isomers on MIL-100/PC TLC plate.

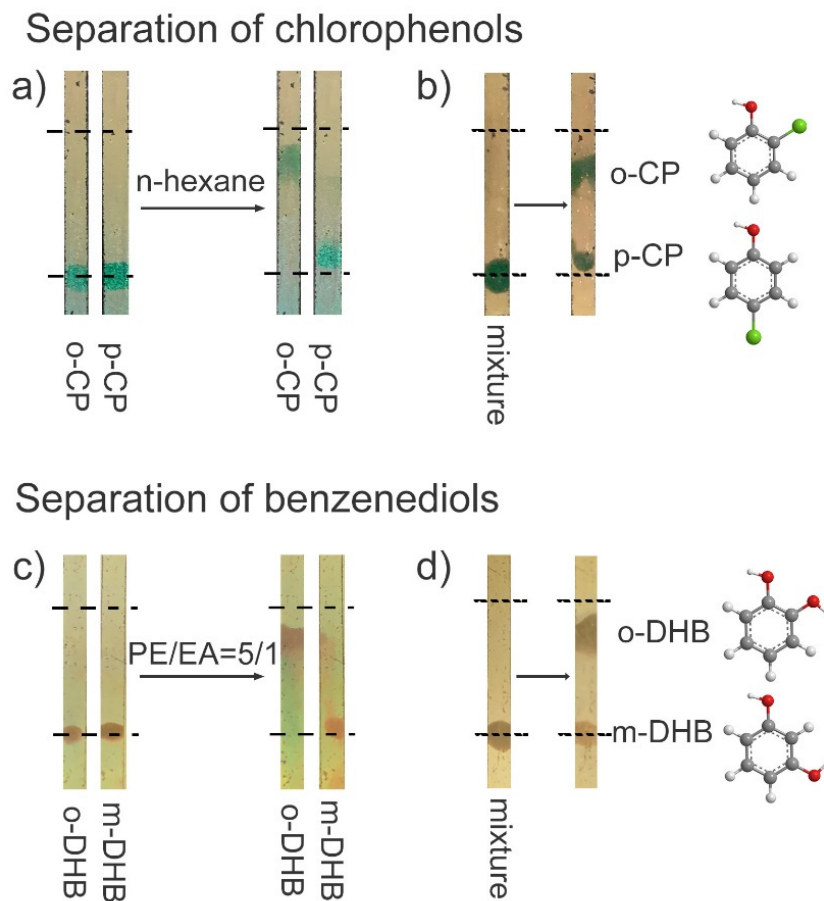

**Figure S9.** Development of a) 2-chlorophenol (o-CP) and 4-chlorophenol (p-CP) on MIL-100/PC by hexane and b) separation of their mixtures under same conditions. Development of c) 1,2-dihydroxybenzene (o-DHB) and 1,3-dihydroxybenzene (m-DHB) on MIL-100/PC by the mixing solvent of petroleum ether and ethyl acetate (5:1) and d) separation of their mixtures.

## 10. Comparison of chromatographic parameters of MOF/PC TLC, TLC and GC

**Table S1.** Retention factor ( $R_{f_m}$ ,  $R_{f_o}$ ), theoretical plate number ( $N_m$ ,  $N_o$ ), selectivity factors ( $\alpha$ ) and resolution ( $R$ ) for m-cresol and o-cresol, which are separated by HKUST-1, ZIF-8 and MIL-100 coated PC films, commercial silica gel TLC plate and commercial silica GC column (HP-5MS).

| Method | Materials        | $R_{f_m}$          | $R_{f_o}$          | $w_m$ | $w_o$ | $N_m$ | $N_o$ | $\alpha$ | $R$  |
|--------|------------------|--------------------|--------------------|-------|-------|-------|-------|----------|------|
| PC TLC | HKUST-1          | 0.367              | 0.535              | 0.241 | 0.263 | 37.1  | 66.2  | 1.46     | 0.67 |
| PC TLC | ZIF-8            | 0.402              | 0.533              | 0.251 | 0.199 | 41.0  | 114.8 | 1.33     | 0.58 |
| PC TLC | MIL-100          | 0.267              | 0.67               | 0.148 | 0.263 | 52.1  | 103.8 | 2.51     | 1.96 |
| TLC    | SiO <sub>2</sub> | 0.67               | 0.746              | 0.217 | 0.238 | 152.1 | 157.2 | 1.11     | 0.33 |
| GC     | SiO <sub>2</sub> | 4.529 <sup>†</sup> | 4.733 <sup>†</sup> | 0.132 | 0.133 | 18835 | 20262 | 1.05     | 1.54 |

<sup>†</sup> Retention time (min) was taken for the calculation of selectivity and resolution for the case of GC.

## 11. Calculation of plate number (N), selectivity factor ( $\alpha$ ), and resolution (R)

In thin layer chromatography (TLC), the retention factor ( $R_f$ ) is defined as the ratio of distance travelled by an individual chemical to the distance travelled by the developing reagent. In gas chromatography (GC), the retention time ( $t_R$ ) is defined as the time required for an individual chemical to migrate through the column. Both of them are used to quantify the migration of chemicals on the stationary phase.

Theoretical plate number ( $N$ ) is an index which describes the number of plates as defined by the plate theory, where the stationary phase is considered to be made up of a number of segments or

plates. For TLC, the theoretical plate number can be calculated by Equation (1), where  $L_s$  is the distance travelled by the sample on the TLC plate, and  $w_s$  is the width of the sample spot. For GC, the theoretical plate number can be calculated by Equation (2), where  $t_R$  is the retention time of the sample and  $w_s$  is its peak width in GC spectrum.

$$N = 16 \times \left( \frac{L_s}{w_s} \right)^2 \quad (1)$$

$$N = 16 \times \left( \frac{t_R}{w_s} \right)^2 \quad (2)$$

Selectivity factor ( $\alpha$ ) is usually defined as the ratio of the retention factors for two samples in the chromatogram. For TLC, the selectivity factor can be calculated by Equation (3), where  $R_{fm}$  and  $R_{fo}$  are the retention factors for m-cresol and o-cresol. For GC, the selectivity factor can be calculated by Equation (4), where  $t_{Rm}$  and  $t_{Ro}$  are the retention times for m-cresol and o-cresol.

$$\alpha = \frac{R_{fo}}{R_{fm}} \quad (3)$$

$$\alpha = \frac{t_{Ro}}{t_{Rm}} \quad (4)$$

Resolution (R) in chromatography is usually defined as the capability to separate two components, and it is a comprehensive factor to evaluate the performance of chromatography. In TLC, it is calculated by Equation (5), where  $L_m$  and  $L_o$  are the distances travelled by m-cresol and o-cresol on the TLC plate, and  $w_m$  and  $w_o$  are the sample spots widths of m-cresol and o-cresol respectively. For GC, the resolution is calculated by Equation (6), where  $t_{Rm}$  and  $t_{Ro}$  are the retention times for m-cresol and o-cresol, and  $w_m$  and  $w_o$  are the peak widths.

$$R = \frac{2(L_o - L_m)}{w_m + w_o} \quad (5)$$

$$R = \frac{2(t_{Ro} - t_{Rm})}{w_m + w_o} \quad (6)$$

For both TLC and GC, the resolution can be calculated by Equation (7) according to its relationship with peak/spot width, selectivity, and plate numbers. It can be concluded that the resolution increases along with the increasing of selectivity and plate numbers, when the peak/spot widths of m-cresol and o-cresol are close to each other.

$$R = \frac{2w_m}{w_m + w_o} \times (\alpha - 1) \times \frac{\sqrt{N_m}}{4} \quad (7)$$
